# Supplementary material for: Supracolloidal reconfigurable polyhedra via hierarchical self-assembly
Source: Royal Society of Chemistry journal article supplement (doi:10.1039/c6sm01615d), 2016-01-01
Supplement: c6sm01615d1.pdf [file c6sm01615d1.pdf]

# Supracolloidal reconfigurable polyhedra via hierarchical self-assembly

Daniel Morpew and Dwaipayan Chakrabarti\*

School of Chemistry, University of Birmingham, Edgbaston, Birmingham B15 2TT, UK

E-mail: d.chakrabarti@bham.ac.uk; use this e-mail address for data.

## Supplementary Results

In Table S1, we present some geometric features for the set of *convex snub polyhedra*.<sup>1</sup> It is evident that the snub tetrahedron is the smallest in this series. We note here that the snub tetrahedron is an icosahedron for having twenty faces; however, we have preferred to use the name ‘snub tetrahedron’ when it is of tetrahedral symmetry as it is then informative of the symmetry of the structure it refers to.

Table S1: A comparison of the geometric features of convex snub polyhedra. Here  $V$  is the number of vertices,  $F$  is the number of faces and  $E$  denotes the number of edges.

| Polyhedron        | Symmetry | V  | F  | E   |
|-------------------|----------|----|----|-----|
| Snub tetrahedron  | $T$      | 12 | 20 | 30  |
| Snub cube         | $O$      | 24 | 38 | 60  |
| Snub dodecahedron | $I$      | 60 | 92 | 150 |

Table S2: A comparison of the anti-parallel arrangements of the dipoles in two neighbouring secondary building blocks of two low-lying minima for  $N = 12$  charge-stabilised colloidal magnetic particles, where  $\theta = 0^\circ$ .  $\phi$  is the angle between the dipole vectors,  $R_{ij}$  is the distance between the centers of the spherical colloidal particles,  $r_{ij}$  is the distance between the point-dipoles and  $E_{ap}$  is the potential energy contribution arising from the two dipoles.

| Minimum                 | $\phi$ | $R_{ij}/\sigma$ | $r_{ij}/\sigma$ | $E_{ap}/\epsilon_Y$ |
|-------------------------|--------|-----------------|-----------------|---------------------|
| The bowl structure      | 172.8  | 1.02            | 0.8             | -7.66               |
| The spherical structure | 164.8  | 1.05            | 0.86            | -6.04               |

Table S3: A comparison of the anti-parallel arrangements of the dipoles in two neighbouring secondary building blocks of two low-lying minima for  $N = 12$  charge-stabilised colloidal magnetic particles, where  $\theta = 10^\circ$ .  $\phi$  is the angle between the dipole vectors,  $R_{ij}$  is the distance between the centers of the spherical colloidal particles,  $r_{ij}$  is the distance between the point-dipoles and  $E_{ap}$  is the potential energy contribution arising from the two dipoles.

| Minimum                 | $\phi$ | $R_{ij}/\sigma$ | $r_{ij}/\sigma$ | $E_{ap}/\epsilon_Y$ |
|-------------------------|--------|-----------------|-----------------|---------------------|
| The spherical structure | 166.3  | 1.07            | 0.94            | -4.74               |
| The bowl structure      | 174.7  | 1.05            | 0.92            | -5.11               |

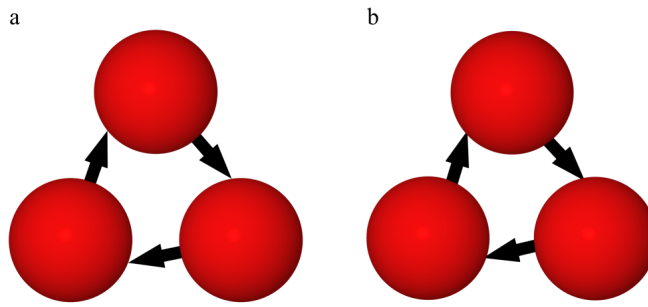

Figure S1: The triangular subunits formed as the secondary building blocks in the hierarchical self-assembly route to hollow spherical structures. (a) The triangular subunit for  $\theta = 0^\circ$ ; (b) the triangular subunit for  $\theta = 10^\circ$ .

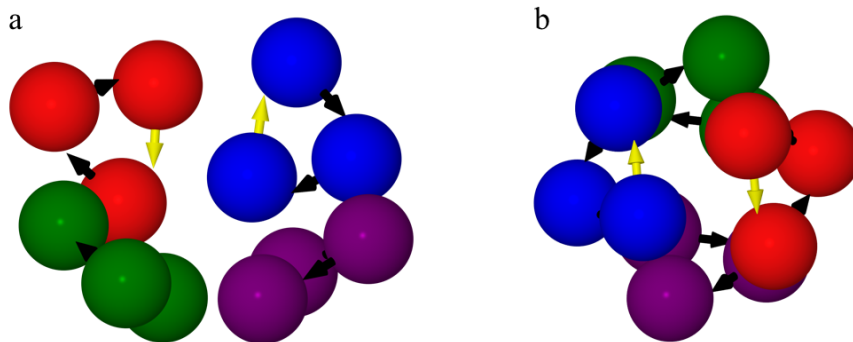

Figure S2: The competing structures, characterised as the low-lying minima on the energy landscape, for  $N = 12$  charge-stabilised magnetic colloids. Representative examples of the anti-parallel arrangement of the dipoles in neighbouring secondary building blocks are clearly shown here and the dipoles concerned are highlighted in yellow. (a) The ground state structure for  $\theta = 0^\circ$ ; (b) the ground state structure for  $\theta = 10^\circ$ . Here  $\theta$  defines the angle between the direction of the dipole and the radial shift.

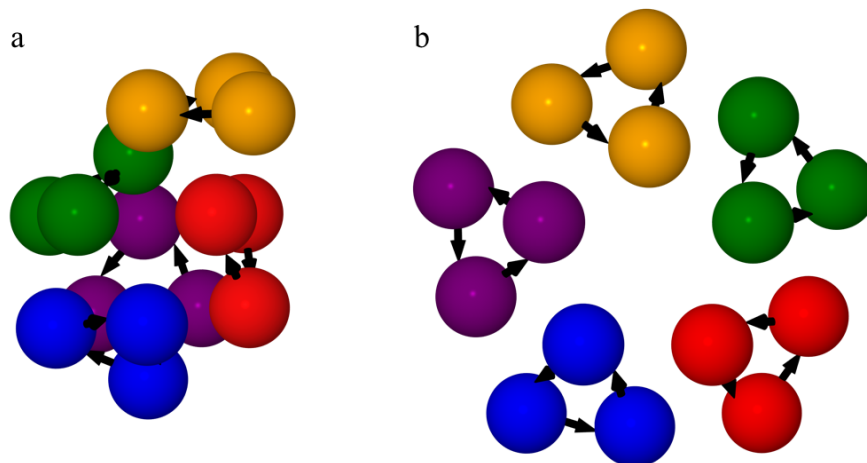

Figure S3: The two structures characterised as the low lying minima on the energy landscape for  $N = 15$  charge-stabilised colloidal magnetic particles, where  $\theta = 10^\circ$ . (a) The ground state structure, which consisted of the snub tetrahedron plus an additional triangular subunit; (b) the bowl structure, a low lying minimum, with an emergent five-fold rotational symmetry.

## Movies

- **Movie 1:** The dominant pathway characterised for the self-assembly into the tubular anti-prismatic ground state structure for  $N = 16$  charge-stabilised magnetic colloidal particles where  $\theta = 90^\circ$  and  $\alpha = 0.3$ , starting from a high-energy, relatively disordered local minimum. The secondary building blocks are colour-coded distinctly as they are formed for visual aid.
- **Movie 2:** The dominant pathway characterised for the self-assembly into the ground state structure, topologically equivalent to the snub tetrahedron, for  $N = 12$  charge-stabilised magnetic colloidal particles where  $\theta = 10^\circ$  and  $\alpha = 0.6$ , starting from a high-energy, relatively disordered local minimum. The secondary building blocks are colour-coded distinctly as they are formed for visual aid.

## References

- [1] P. R. Cromwell, *Polyhedra*, Cambridge University Press, Cambridge, 1997.
